1 **Rolling stones gather moss: Movement and longevity of moss balls on an Alaskan**  
2 **glacier**

3  
4 Scott Hotaling<sup>1</sup>, Timothy C. Bartholomaus<sup>2</sup>, and Sophie L. Gilbert<sup>3</sup>

5  
6 **Affiliations:**

7 <sup>1</sup> School of Biological Sciences, Washington State University, Pullman, WA, USA; ORCID =  
8 0000-0002-5965-0986

9 <sup>2</sup> Department of Geology, University of Idaho, Moscow, ID, USA; ORCID = 0000-0002-1470-  
10 6720

11 <sup>3</sup> College of Natural Resources, University of Idaho, Moscow, ID, USA; ORCID = 0000-0002-  
12 9974-5146

13  
14 **Correspondence:** Sophie L. Gilbert, College of Natural Resources, University of Idaho,  
15 Moscow, ID, 83844, USA; Email: [sophiegilbert@uidaho.edu](mailto:sophiegilbert@uidaho.edu); Phone: (208) 885-8605

16  
17 **Abstract:**

18 Glaciers support diverse ecosystems that are largely comprised of microbial life. However, at  
19 larger, macroscopic scales, glacier moss balls (sometimes called “glacier mice”) develop from  
20 impurities in the ice and represent a relatively rare biological phenomenon. These ovoid-shaped  
21 conglomerations of dirt and moss are only found on some glacier surfaces and provide key  
22 habitats for invertebrate colonization. Yet, despite their development and presence being widely  
23 reported, no targeted studies of their movement and longevity have been conducted. This  
24 knowledge gap is particularly important when considering the degree to which glacier moss  
25 balls may represent viable, long-term biotic habitats on glaciers, perhaps complete with their  
26 own ecological succession dynamics. Here, we describe the movement and longevity of glacier  
27 moss balls on the Root Glacier in southcentral Alaska, USA. We show that glacier moss balls  
28 move an average of 2.5 cm per day in herd-like fashion, and their movements are positively  
29 correlated with glacier ablation. Surprisingly, the dominant moss ball movement direction does  
30 not align with the prevailing wind nor downslope directions; instead, we propose that it depends  
31 on the dominant direction of solar radiation. We also show that glacier moss balls are relatively  
32 long-lived, with a lifespan in excess of 6 years and annual survival rates similar to large  
33 vertebrates. Finally, we observed moss ball formation on the Root Glacier to occur within a

34 narrow, low albedo stripe downwind of a nunatak, a potential key source of moss spores and/or  
35 fine-grained sediment that interact to promote their formation.

36

37 **Keywords:** cryobiology, glacier mice, glacier biology, jokla-mys, Root Glacier, Wrangell-St.  
38 Elias National Park

39

#### 40 **Introduction:**

41           Glaciers have long been overlooked as important components of global biodiversity, but  
42 it is now clear that they host thriving, multi-trophic ecosystems (Anesio and Laybourn-Parry  
43 2012), supporting taxa from microbes to vertebrates (Rosvold 2016; Dial et al. 2016; Hotaling et  
44 al. 2019; Hotaling et al. 2017b). Most biological activity on glaciers occurs within surface ice  
45 where microorganisms take advantage of nutrients that are either wind-delivered or generated  
46 *in situ* (Hotaling et al. 2017b). In addition to a nutrient input, impurities on the glacier surface can  
47 drive the development of at least two potential “hotspots” of biological diversity on glaciers: well-  
48 studied cryoconite holes (depressions in the ice surface caused by local melt, Anesio et al.  
49 2017) and glacier moss balls (ovular conglomerations of moss and sediment that move on the  
50 glacier surface, Coulson and Midgley 2012).

51           Under the right conditions, a small piece of rock or other impurity can set in motion the  
52 formation of a glacier moss ball [also referred to as “jokla-mys” (Eythórsson 1951), “glacier  
53 mice” (e.g., Coulson and Midgley 2012), or “moss cushions” (e.g., Porter et al. 2008)]. On a  
54 local scale, glacier moss balls are typically distributed with some degree of local clustering (e.g.,  
55 ~1 glacier moss ball/m<sup>2</sup>; Fig. 1). While more immobile moss aggregations have been observed  
56 on glaciers elsewhere (e.g., East Africa, Uetake et al. 2014), true glacier moss balls appear to  
57 be particularly rare, having only been described on a few geographically disparate glaciers in  
58 Alaska (Shacklette 1966; Heusser 1972), Iceland (Eythórsson 1951), Svalbard (Belkina and  
59 Vilnet 2015), and South America (Perez 1991). Many different moss species have been found in  
60 glacier moss balls (Shacklette 1966; Heusser 1972; Perez 1991; Porter et al. 2008), suggesting  
61 that they are not dependent on specific taxa, but instead their development is likely driven by  
62 the interaction of suitable biotic (e.g., availability of moss spores) and abiotic (e.g., growth  
63 substrate) factors. However, the specific steps and timeline underlying glacier moss ball genesis  
64 remains unclear.

65           An intriguing aspect of glacier moss balls, and one that is almost certainly partially  
66 responsible for their “glacier mice” namesake, is their movement. Though the speed and  
67 direction of glacier moss ball travel has not been studied, it has been posited that they move by

68 inducing the formation of an ice pedestal, then rolling or sliding off of it (Porter et al. 2008). Moss  
69 balls first reduce local albedo by shielding the ice beneath them from sunlight and locally  
70 reducing the ablation rate. As the surrounding ice melts, the glacier moss ball is left on an  
71 elevated pedestal. Eventually, a threshold is reached where the moss ball falls from its pedestal  
72 and the process begins anew, potentially including a “flip” of the moss ball that exposes what  
73 was previously their underside (Porter et al. 2008). However, the speed and direction of moss  
74 ball movement has not been tested, though it has been suggested that their movements  
75 generally track the downslope direction of their local habitat (Porter et al. 2008).

76         Where they do occur, glacier moss balls contribute to glacier biodiversity by offering a  
77 thermally buffered, island-like habitat on the glacier surface that can host a wide array of  
78 invertebrates (Coulson and Midgley 2012). On Icelandic glaciers, moss balls contain  
79 invertebrate communities dominated by springtails (Collembola), tardigrades (Tardigrada), and  
80 nematodes (Nematoda; Coulson and Midgley 2012). While an array of potential food resources  
81 are available on glacier surfaces (Hotaling et al. 2017b), these are typically only exploited by  
82 invertebrates on the margins of glaciers (e.g., springtails, spiders, grylloblattids) because  
83 suitable on-glacier habitat is lacking (Mann et al. 1980). Glacier moss balls may therefore  
84 provide key habitable islands on the glacier that facilitate wider resource exploitation versus  
85 glaciers without moss balls (Coulson and Midgley 2012). It is also possible that glacier moss  
86 balls, which have not been shown to be inhabited by larger predatory insects (e.g.,  
87 grylloblattids) may provide prey refuge that are sufficiently removed from the typical foraging  
88 areas of their predators. Either way, it is clear that glacier moss balls represent important habitat  
89 for glacier-associated fauna yet basic aspects of their ecology (e.g., longevity and movement)  
90 are unknown.

91         In this study, we took an integrated behavioral ecology and geophysical approach to the  
92 study of glacier moss balls to answer three basic questions about their life history: (1) What is  
93 the lifespan of a glacier moss ball? (2) How quickly do they move and is their movement  
94 idiosyncratic or herd-like? (3) Are the movements of glacier moss balls linked to the ablation of  
95 the glacier itself? The answers to these questions have implications for invertebrate fauna in  
96 glaciated ecosystems, nutrient cycling (both directly via moss ball decomposition and indirectly  
97 as supporting habitat for biotic communities), and feedback between glacier moss balls and  
98 local ablation rates. Beyond biotic interactions and ecosystem dynamics, glaciers are rapidly  
99 receding worldwide (Gardner et al. 2013; Larsen et al. 2015; Roe et al. 2017) and their  
100 diminished extents will almost certainly affect the persistence of glacier moss balls on local and

101 global scales. Thus, it is important to better understand these unique micro-ecosystems before  
102 their habitats are lost.  
103

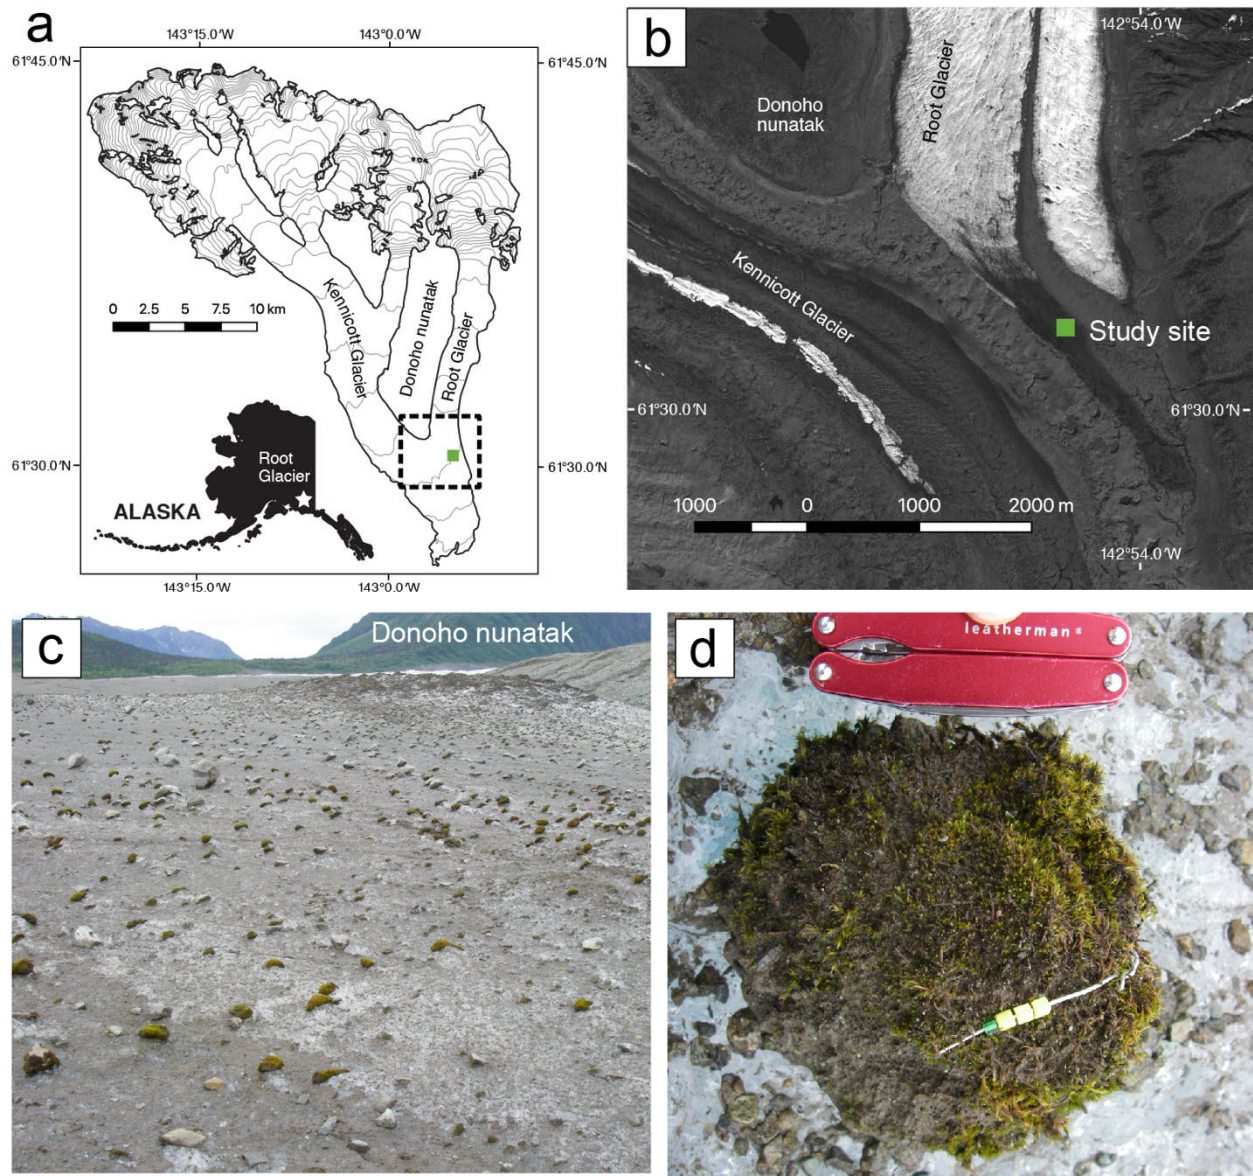

104

105 **Fig. 1.** a) Our study site (solid green square) on the Root Glacier in southcentral Alaska, USA, within  
106 Wrangell-St. Elias National Park. Contour lines are spaced every 100 m in elevation. The dashed square  
107 represents the field of view shown in panel (b). The inset map shows the location of the Root Glacier  
108 (white star) within Alaska. b) Satellite image of the study site (green square) showing the confluence of  
109 the Root and Kennicott Glaciers with the Donoho nunatak to the northwest. The image was recorded on  
110 19 June 2013. c) A landscape view looking northwest of the study site dotted with glacier moss balls. d) A  
111 close-up view of a glacier moss ball with the type of bracelet tag used in this study.  
112

### 113 **Materials and methods:**

114 *Study area*

115 We conducted fieldwork over four years (July, 2009 - July, 2012) on the lowest portion of  
116 the Root Glacier, a major tributary to the Kennicott Glacier, in the Wrangell Mountains in  
117 Wrangell-St. Elias National Park, Alaska, USA (Fig. 1a). Our study area (61.5076° N, 142.9172°  
118 W, ~700 m elevation) spanned a ~15 x ~40 m (600 m<sup>2</sup>) area of glacier ice selected for its  
119 especially high concentration of moss balls. The site has a gentle slope, dipping 3° east-  
120 northeast (N75°E) and is found between two medial moraines (Fig. 1b), each ~100 m away.  
121 Moss ball concentrations decrease both up- and down-glacier and are absent from the coarse-  
122 grained (> 5 cm) rock that covers the adjacent medial moraines.

123 We estimated the proportion of fine-grained sediment cover on the ice within our study  
124 area by applying image processing techniques in the Python package scikit-image (Van der  
125 Walt et al. 2014) to two vertical photographs taken of representative ice surfaces. Pixel  
126 brightness contrasts between ice and sediment are most distinct within the blue band of the red-  
127 green-blue images, so we differentiated between sediment (dark pixels) and ice (bright pixels)  
128 by binarizing the blue band with Otsu's thresholding method. We then performed a  
129 morphological opening to diminish the influence of light-colored sediment grains set within the  
130 otherwise dark sediment cover. Finally, we quantified the areal sediment cover as being  
131 approximately equal to the number of dark colored pixels relative to the total number of pixels in  
132 the binarized images.

133

#### 134 *Mark-recapture*

135 During the summer of 2009, we tagged 30 glacier moss balls with a bracelet identifier  
136 (Fig. 1d). Each bracelet consisted of a unique combination of colored glass beads (~2-3 mm in  
137 diameter) threaded on aluminum wire. Bracelets were threaded through the moss ball center  
138 and pulled snug so as to not protrude beyond the moss ball's exterior and interfere with  
139 movement. We returned eight times during the 2009 season to re-survey moss balls and record  
140 their movements. We followed up our initial surveys with annual visits from 2010-2012. During  
141 each survey, we visually inspected in and around the core study area multiple times in an effort  
142 to recapture moss balls. As part of this process, we visually inspected each moss ball in the  
143 area for any sign of a bracelet tag. After inspection, we replaced each moss ball in the exact  
144 location and orientation as it was found.

145

#### 146 *Moss ball movement and glacier ablation*

147 We assessed moss ball movement over 54 days in 2009. As benchmarks for their  
148 movement, we installed three ~1.3 cm PVC tubes into the glacier. Each stake was drilled ~60

149 cm into the glacier. Stakes were installed in a triangle that spanned the study area and served  
150 two purposes. First, the stakes provided a reference against which the location of each moss  
151 ball was measured. Second, they allowed us to measure glacier ablation (i.e., the distance the  
152 ice surface moves vertically down) over the same study period so we could test for links  
153 between moss ball movement and the rate of glacier ablation.

154 To track glacier moss ball movement, we measured the distance between re-identified  
155 moss balls and each of the reference stakes for each visit to the site. Next, for each moss ball,  
156 we calculated three independent positions within our field site--one for each of the three pairs of  
157 reference stakes. We assigned the location of a surveyed moss ball to the mean of these three  
158 relative positions and constructed a location covariance matrix for each measurement, to assign  
159 uncertainties to surveyed locations. After diagonalizing the covariance matrix, we identified the  
160 size (eigenvalues) and orientation (eigenvectors) of an uncertainty ellipse around each mean  
161 location. Major and minor axes of the uncertainty ellipse were defined as twice the square root  
162 of the eigenvalue lengths, such that each error ellipse represented a  $2\sigma$  error window. Thus,  
163 assuming independent, normal errors, we are 95% confident that the true location of each moss  
164 ball fell within its error ellipse. While we used stakes for most of the measurement period, we  
165 were forced to switch to washers (~5 cm in diameter) laid flat on the ice surface later in the  
166 season, during a period when we were unable to drill the benchmark stakes sufficiently deep to  
167 avoid melting out between visits to the study area. Before transitioning from benchmark stakes  
168 to washers, we tested the stability of the washers to ensure that they did not slide over the ice  
169 surface. Over a 5-day period, we did not detect significant washer movement (outside of  $2\sigma$   
170 uncertainty). Final measurements (11 August 2009) and calculations were made relative to the  
171 washers.

172 For the purposes of quantifying glacier ablation, the height of each stake above the local  
173 ice surface was re-measured during each visit and periodically re-drilled into the ice as  
174 necessary. Ablation reported in this study is the mean ice surface lowering rate calculated for  
175 each of the three stakes. As an assessment of ablation uncertainty, we also calculated the  
176 maximum deviation of any single stake's ablation rate from the overall mean.

177

### 178 *Longevity*

179 We sought to understand how long glacier moss balls survive, particularly across  
180 individual seasons. We hypothesized that moss balls might survive better or worse in some  
181 years due to variation in environmental conditions (e.g., precipitation, freeze-thaw cycles) or  
182 random chance (e.g., a crevasse opening within a key area). Furthermore, we wanted to know

183 not only how likely we are to detect glacier moss balls, given that they had persisted within the  
184 study area, but also if our detection probability varies among years. To do this, we fit capture-  
185 recapture models of annual survival to each glacier moss ball included in the study. Because  
186 moss balls were individually marked but were not equipped with radio-transmitters or other  
187 devices which would allow us to know their ultimate fates, we applied Cormack-Jolly-Seber  
188 (CJS; Lebreton et al. 1992) survival models. These CJS models develop a “capture history” of  
189 each moss ball to estimate apparent survival (i.e., the probability that an individual is in the  
190 population at time  $i$  and still in the population at time  $i+1$ ) and probability of detection if they  
191 persisted within our study area. Survival estimates from CJS models only represent apparent  
192 survival because emigration cannot be estimated from survival data with unknown fates (i.e., we  
193 did not know if a tagged moss ball had disaggregated, lost its identifying bracelet, or was no  
194 longer in the study area). Therefore, our estimates of apparent survival are likely to  
195 underestimate true survival (e.g., a moss ball might have lost its bracelet or moved out of the  
196 study site). In addition, CJS models also account for imperfect detection, which in our case  
197 would be if a moss ball persisted within our study area but was overlooked.

198 Using our individual moss ball annual detection data (1 = detected, 0 = not detected), we  
199 fit four competing CJS survival models, including the null model [no effect of year on apparent  
200 survival ( $\phi$ ) or detection probability ( $p$ ); Model 1], an effect of year on  $\phi$  (Model 2), an effect of  
201 year on  $p$  (Model 3), or an effect of year on both  $\phi$  and  $p$  (Model 4). We then selected the  
202 model(s) best supported by our data using Akaike’s information criterion (AIC; Akaike 1998),  
203 adjusted for small sample size (AICc; Hurvich and Tsai 1989). Our model selection approach  
204 was based on model likelihoods and models were penalized for extra parameters to favor  
205 parsimony.

206 Finally, we calculated the average life expectancy of a glacier moss ball. To do this, we  
207 used annual survival rates based on life-table analysis (Deevey Jr 1947; Millar and Zammuto  
208 1983), in which average life expectancy was calculated as  $-1/\ln(\text{Annual Survival Rate})$ . Because  
209 this estimation of life expectancy is quite sensitive to annual survival rate, we calculated it for  
210 both the lowest annual survival rate and the mean annual survival rate. Thus, the true average  
211 life expectancy might be substantially greater than the conservative values estimated here. This  
212 framework for estimating average life expectancy does not account for potentially higher or  
213 lower mortality rates when glacier moss balls are first forming or nearing the end of their  
214 lifespans.

215

216 **Results:**

217 *Study area*

218 Our study area was located on a “bare ice” glacier surface, between two medial  
219 moraines covered by coarse-grained, angular, rock debris. However, two types of sediment  
220 distinguish the study area surface from what would be considered clean, pure, water ice. First,  
221 glacier moss balls were found amidst gravel and small boulders (< 30 cm diameter), spaced  
222 every ~1 m. Second, the ice surface within the study area has an unusually pervasive, fine-  
223 grained sediment cover, ~1-3 mm thick, which partially blankets the otherwise bare ice. Image  
224 processing indicated that this fine sediment covers approximately 70% of the study area  
225 surface. This low albedo sediment cover is visible in all inspected satellite imagery of the site  
226 and first appears at lower concentrations emerging from cleaner ice ~1 km northwest of the  
227 study site (Fig. 1b). Down-glacier of the study site, the low albedo region extends ~1.7 km as a  
228 ~300-m-wide, rounded finger that spans adjacent medial moraines, in a manner consistent with  
229 wind-deposited dust, draping over underlying geomorphic features. Therefore, we interpreted  
230 the southeast (135°) trend direction of this low albedo finger to be the prevailing, down-glacier,  
231 katabatic wind direction.

232 During the 26 days of glacier ablation measurements, the ice surface lowered by 1.91 m  
233 due to melt and sublimation. Ablation rates ranged from 5.8-9.6 cm per day (cm/d) between  
234 measurement times, and averaged 7.3 cm/d.

235

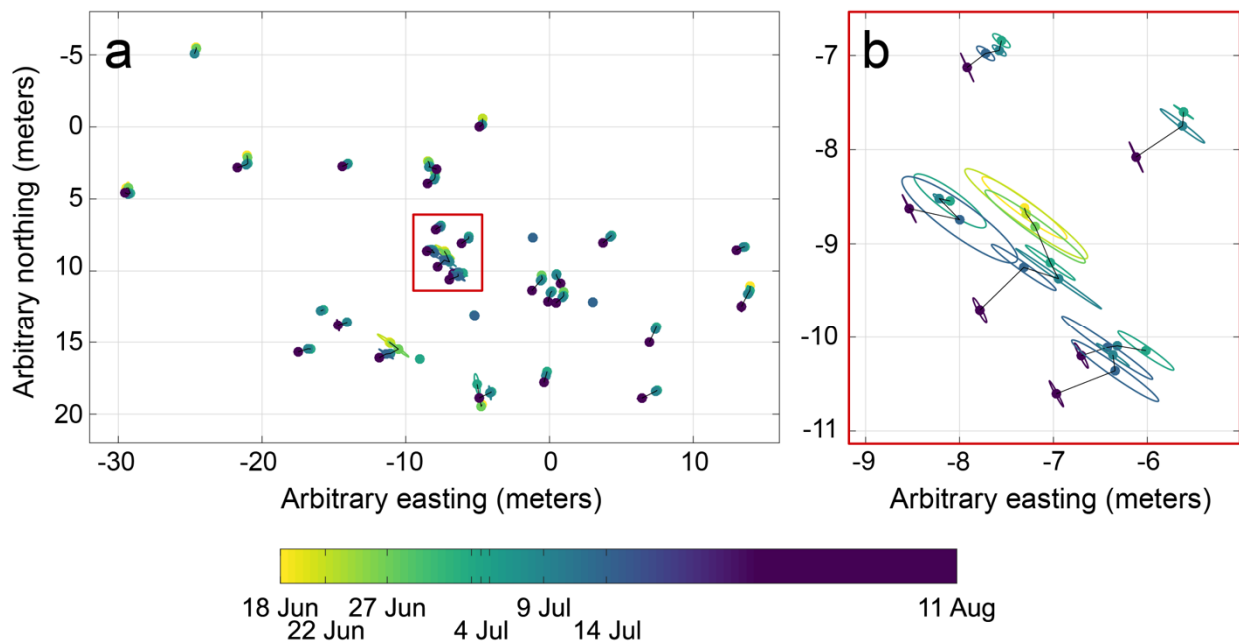

237 **Fig. 2.** (A) Locations of surveyed glacier moss balls throughout the survey period. Most likely locations of  
238 each moss ball are shown with small filled circles relative to an arbitrary, local grid system. Ellipses  
239 surrounding each moss ball indicate 2 uncertainty (i.e., 95% confidence) of their location. Thin black

240 lines connect consecutive surveyed locations for individual moss balls. The red rectangle identifies the  
241 location of the large-scale view in panel (B). (B) A zoomed in view of movement patterns for six glacier  
242 moss balls (red square in A), showing their similar azimuths.  
243

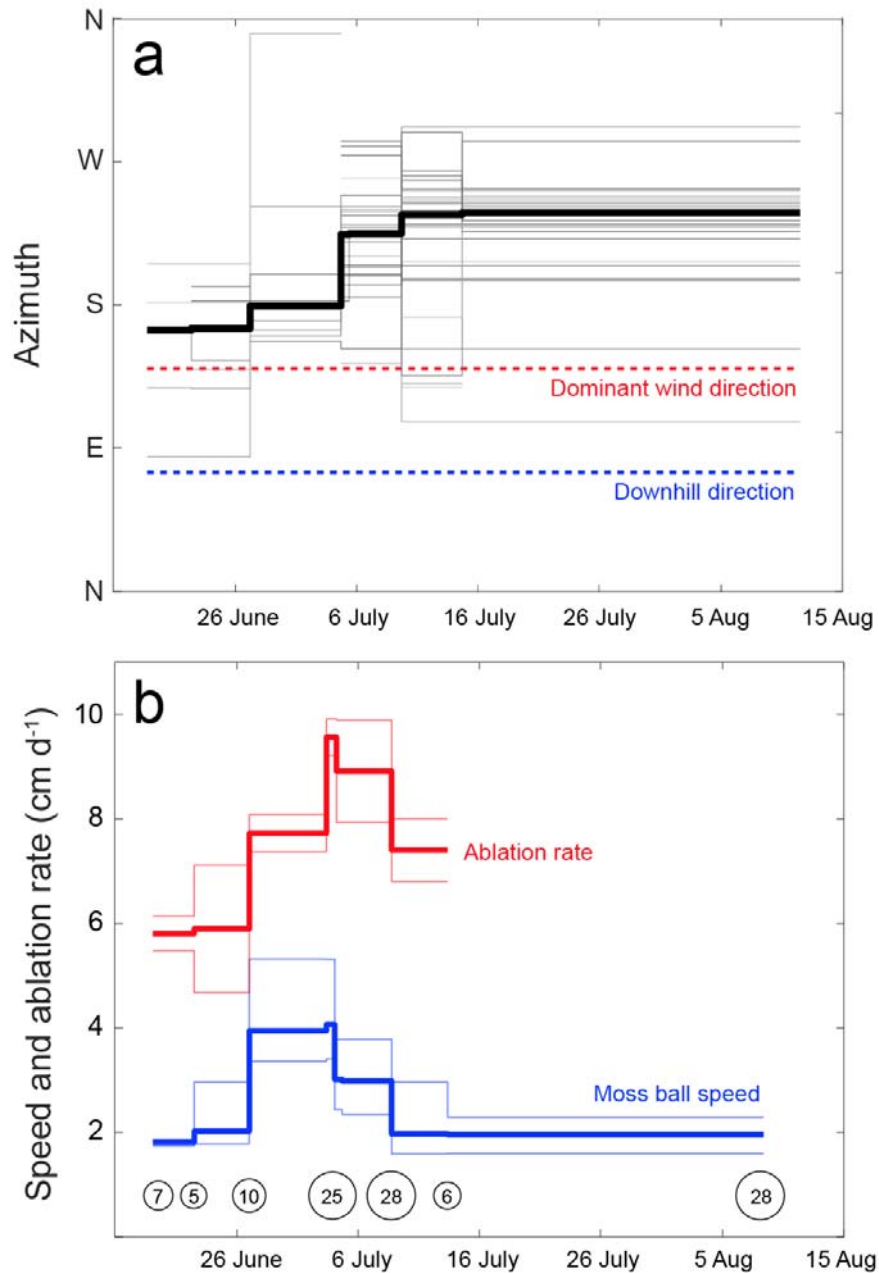

244  
245 **Fig. 3.** (A) A comparison of glacier moss ball movements versus the dominant wind (dashed red line) and  
246 downslope (dashed blue line) directions. Direction of each moss ball's motion between measurement  
247 times is shown with thin gray lines, while the bold black line indicates the median direction of all glacier  
248 moss ball movements. (B) Glacier moss ball movement versus ablation rate. Median ablation rate is  
249 indicated with a bold red line, while the mean +/- the maximum absolute deviation from the mean are  
250 shown with thin red lines. The median speed of glacier moss balls is shown with the bold blue line, while  
251 the 25th and 75th percentile speeds are shown with thin blue lines. Numbers in circles along the bottom  
252 of the plot represent the number of moss balls surveyed at each timepoint (single measurements not  
253 indicated).

254

## 255 *Movement*

256            Glacier moss ball movements varied systematically over the study period, with increases  
257 and decreases that coincided with changes in direction (Figs. 2-3). Median moss ball speed was  
258 2.5 cm/d, but their rates varied widely throughout the season. The median speed started at 1.8  
259 cm/d in late June, increased to 4.0 cm/d at the start of July, then slowed to 2.0 cm/d during late  
260 July/early August. The maximum observed speed for any glacier moss ball was 7.8 cm/d during  
261 the 5-day period from July 9-14 (excluding two outlier speeds that were more than 8 interquartile  
262 ranges greater than the median, 14.2 and 21.0 cm/d, and which were based upon particularly  
263 uncertain moss ball positions). The interquartile range of moss ball speeds was approximately  
264 50% of the median speed; thus, these observed increases and decreases in speed reflect  
265 changes in the entire population of moss balls.

266            The direction of glacier moss ball movements was not random. Rather, glacier moss  
267 balls underwent clear changes in their direction of motion (i.e., azimuth) throughout the summer  
268 season (Fig. 3a). While individual moss balls moved in many directions, when viewed in  
269 aggregate, azimuths of the population clearly cluster over time. Early in the season, median  
270 moss ball motion was south-southeast ( $165^\circ$ ) but over the ensuing weeks azimuths  
271 progressively increased, such that at the end of the measurement period the median azimuth  
272 was west-southwest ( $240^\circ$ ; Fig. 3a).

273            Considering speeds and azimuths together, we see the moss ball population initially  
274 moving at 2 cm/d to the south for 9 days, then the group nearly doubles its speed to 4 cm/d  
275 while deviating slightly to the right (towards the west). After a week at these maximum speeds,  
276 speeds drop by 25% to 3 cm/d while also deviating 45 degrees further towards the west for five  
277 days. During the next 5-day measurement period, speeds drop further, back to 2 cm/d while the  
278 azimuths turn another 10-15 degrees further west. Over the final 28-day measurement period,  
279 the azimuths remain stable, while speeds continued to fall. This decrease in speed is apparent  
280 in the decline of the upper quartile of speeds, despite our not making sufficient new  
281 measurements to influence the median speed.

282            Our fine-scale movement and ablation data allowed us to compare glacier moss ball  
283 speeds and azimuths with potential drivers of their motion. The southern and western directions  
284 of moss ball movement are clearly distinct from both the prevailing wind direction as inferred  
285 from the dust plume (towards the southeast) or the downhill direction of the gently sloping ice  
286 surface (towards the east-northeast; Fig. 3a). Instead, we find more rapid moss ball speeds are  
287 associated with more rapid ablation; an ordinary least squares model between ablation rate and

288 speed indicates that, on average, for every 1 cm of surface ablation, the glacier moss balls  
 289 move horizontally 0.34 cm (Fig. 3b). However, the relationship between ablation rate and speed  
 290 is relatively weak ( $R^2 = 0.40$ ). It should also be noted that during the course of our study,  
 291 participants in a program hosted by the Wrangell Mountains Center, McCarthy, Alaska, visually  
 292 confirmed the posited primary movement method described by Porter et al. (2008), when a  
 293 glacier moss ball was observed rolling off its elevated pedestal and inverting in the process.  
 294

295 **Table 1.** Apparent survival models for glacier moss balls tested in this study with their  
 296 corresponding Akaike's Information Criterion scores that have been adjusted for small sample  
 297 sizes (AICc). Relative AICc scores ( $\Delta$ AICc) model weight are also given. Lower  $\Delta$ AICc and  
 298 higher model weight indicate greater support for a given model. Model components: probability  
 299 of detection ( $p$ ), apparent survival ( $\phi$ ).  
 300

| Model | Description                           | AICc   | $\Delta$ AICc | Weight |
|-------|---------------------------------------|--------|---------------|--------|
| 1     | Null; No year effect on $p$ or $\phi$ | 107.09 | 1.56          | 0.26   |
| 2     | Year effect on $\phi$                 | 105.53 | 0             | 0.58   |
| 3     | Year effect on $p$                    | 108.92 | 3.39          | 0.10   |
| 4     | Year effect on both $p$ and $\phi$    | 110.25 | 4.72          | 0.05   |

301  
 302  
 303  
 304  
 305

**Table 2.** Estimates of the apparent survival ( $\phi$ ) and detection probability ( $p$ ) of glacier moss balls for the two best-fit models. Parentheses after estimates indicate 95% confidence intervals.

| Model | Parameter          | Estimate         |
|-------|--------------------|------------------|
| 1     | $p$                | 0.84 (0.70-0.92) |
|       | $\phi$             | 0.86 (0.75-0.93) |
| 2     | $p$                | 0.82 (0.69-0.91) |
|       | $\phi$ (2009-2010) | 0.74 (0.55-0.87) |
|       | $\phi$ (2010-2011) | 0.98 (0.27-0.99) |
|       | $\phi$ (2011-2012) | 1.0 (0.99-1)     |

306

### 307 *Longevity*

308 We initially tagged 30 glacier moss balls in 2009. We subsequently recaptured 18 moss  
 309 balls each in 2010, 2011, and 2012 (although this was not the same 18 moss balls each year).  
 310 Recapture rates for individual glacier moss balls were highly variable with some never seen  
 311 again after the first year ( $n = 8$ ) and others detected every year ( $n = 13$ ). The best-fit survival  
 312 model included differing apparent survival ( $\phi$ ) among years, but with constant detection  
 313 probability ( $p$ ; Model 2; Table 1). This model received 58% of AICc weight, compared to 26% for  
 314 the null model (Model 1), and less than 10% for the other models (Models 3 & 4; Table 1). The  
 315 average annual rate of apparent survival,  $\phi$ , based on the null model, was 0.86 [95%  
 316 confidence interval (CI) = 0.75-0.93], and the average detection rate was 0.84 (95% CI = 0.70-

317 0.92). When parameterized by year, the annual apparent survival rate ranged from 0.74 in  
318 2009-2010 to 1.0 in 2011-2012 with a particularly large 95% CI for 2010-2011 (Table 2; Fig. 4).

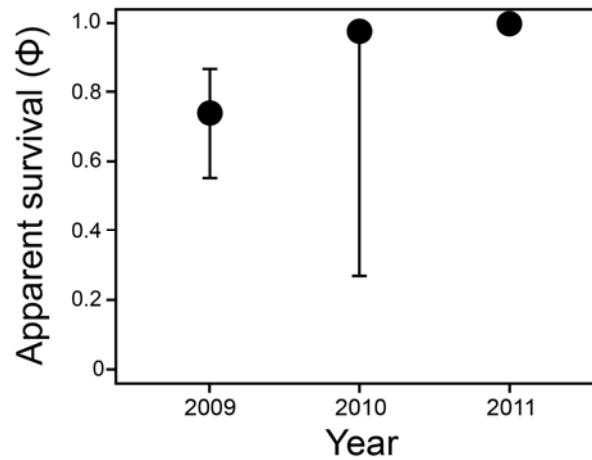

319

320 **Fig. 4.** Estimates of apparent moss ball survival ( $\Phi$ ; dark circles) with 95% confidence intervals (thin dark  
321 lines) from model 2, the best-fit model, which included a year effect on  $\Phi$ . Year-long, bracketed time  
322 intervals labeled on the x-axis are identified by their starting year. For instance, apparent survival for  
323 2009-2010 is shown as 2009.  
324

324

325 Our detection rate estimates may underestimate actual glacier moss ball survival for  
326 several reasons. First, at least four glacier moss balls lost their marking bracelet after the first  
327 year because we found the marking bracelet on the ice, separate from a moss ball. Second,  
328 another moss ball partially obscured its bracelet by growing to cover the beads, but we were  
329 able to detect a single bead and then delicately “excavate” the bracelet. Since we did not  
330 destructively search glacier moss balls that did not have an obvious bracelet, it is possible that  
331 additional instances of lost marking bracelets or growth to cover beads may have impacted our  
332 detection. Third, between 2009 and 2010, two tagged moss balls fell inside of a shallow  
333 crevasse within the study area. The two crevasse-bound glacier moss balls persisted, and likely  
334 continued to photosynthesize and grow to some capacity for the remainder of the study. We  
335 continued to check crevasses in the study area carefully, but some moss balls could have fallen  
336 into deeper crevasses, or into shallow crevasses in a way that obscured their markings, and  
337 therefore persisted without detection.

338 Our estimate of average life expectancy varied depending on whether the lowest overall  
339 or mean annual survival rate were used. If using the lowest annual survival rate (0.74), average  
340 life expectancy was 3.3 years (95% CI = 1.67-7.18). However, we expect this life expectancy to  
341 be biased low to some extent, because we were only able to estimate apparent survival (e.g.,  
342 some insecure tags fell off moss balls that likely still persisted). If using the mean annual

343 apparent survival rate across the entire study (0.86), average life expectancy rose to 6.63 years  
344 (95% CI = 3.48-13.78), although this may be biased high because we did not tag any new moss  
345 balls in years 2 and 3 (2010 and 2011), but simply re-captured existing (and therefore high  
346 survival probability) glacier moss balls. When thinking of lifespan, it is relevant to note that we  
347 also observed a glacier moss ball split roughly in half during the course of the study along its  
348 intermediate axis. The moss ball had become elongated and essentially pulled apart. This  
349 mechanism may contribute to both keeping glacier moss balls ovular as well as a form of  
350 cloning, propagating new moss balls on the landscape.

351

## 352 **Discussion:**

353 Glacier moss balls are intriguing components of glacier ecosystems that integrate  
354 physical (e.g., debris cover) and ecological (e.g., invertebrate colonization) factors into a unique  
355 habitat type. Glacier moss balls have a global distribution, with colonies identified in Iceland,  
356 North and South America, and Asia (Eythórsson 1951; Heusser 1972; Perez 1991; Porter et al.  
357 2008; Coulson and Midgley 2012) and more dispersed moss aggregations on glaciers have  
358 been described from an even broader area (e.g., Uganda, Uetake et al. 2014). Previous studies  
359 have revealed a great deal about glacier moss ball biology (e.g., their invertebrate colonizers,  
360 Coulson and Midgley 2012) yet their movement and longevity has remained unknown. It has  
361 been speculated that glacier moss ball movement patterns likely follow the general downward  
362 slope of the glacier (Porter et al. 2008) and that they represent an ephemeral habitat type on  
363 glaciers, a factor that may limit colonization by specific invertebrate taxa (e.g., spiders; Coulson  
364 and Midgley 2012). Our results do not align with these predictions of movement and longevity.  
365 Rather, we show that glacier moss balls, at least on a relatively gently sloped Alaskan glacier,  
366 exhibit relatively quick (2.5 cm/d) herd-like movements that do not align with the downward  
367 slope of the glacier nor the dominant wind direction. Glacier moss balls are also relatively long-  
368 lived with a mean lifespan of more than 6 years.

369

## 370 *Movement*

371 On the Root Glacier, glacier moss balls move relatively quickly (~2.5 cm/d) in similar  
372 general directions and at similar general speeds. Directions of motion do not align solely with  
373 either the downhill direction nor the direction of the prevailing wind. The rate of glacier moss ball  
374 movements is also positively correlated, albeit weakly, with overall glacier ablation (Fig. 3b). It  
375 appears likely that the dominant direction of solar radiation, which melts exposed ice  
376 surrounding glacier moss balls more rapidly than the insulated ice below them (Porter et al.

377 2008), is the major force driving glacier moss ball movement. However, the relative  
378 contributions of gravity in the downslope direction versus solar radiation is almost certainly  
379 dependent on glacier steepness. Porter et al. (2008) posited a considerable effect of gravity on  
380 glacier moss ball movement for a relatively steep (9.6°) Icelandic glacier which contrasts with  
381 our much flatter study area on the Root Glacier (~3°). Still, regardless of steepness, differential  
382 melt patterns create pedestals that glacier moss balls rest upon and, eventually, enough ice  
383 melts below the moss ball causing it to fall and potentially flip (Porter et al. 2008). Assuming  
384 glacier moss balls are, on average, ~10 cm in their intermediate axis, and their only means of  
385 movement is melt-induced flipping driven by pedestal emergence at the rate of 6-9 cm/d, their  
386 rates of movement would imply each glacier moss ball flips every ~2-4 days. However, we  
387 cannot rule out alternative modes of glacier moss ball movement. Many glacier moss balls have  
388 one side that is flattened and commonly faces down, while the other, more rounded and  
389 vegetated side faces skyward (Shacklette 1966). Given this orientation, an alternative scenario  
390 is that glacier moss balls also move by basal sliding over the wet glacier surface below.

391 One movement-related question remains puzzling: why do the azimuths of glacier moss  
392 balls appear to shift simultaneously throughout the summer season, resulting in the moss ball  
393 “herd” synchronously changing directions (Fig. 3a)? They begin the season moving generally  
394 south and slowly transition towards the west. Given their independence from the dominant wind  
395 direction and downhill direction of the glacier, we can speculate that a slow shift in the dominant  
396 direction of solar radiation or shifting weather patterns during summer drives this pattern.  
397 Perhaps the weather transitioned from clear mid-day skies during late June and early July  
398 (associated with the most rapid motion and southerly azimuths), to a different weather pattern in  
399 late July consisting of morning clouds and afternoon sun, that drives enhanced ablation on the  
400 west sides of moss balls, and therefore preferential rolling towards the west. Furthermore, the  
401 interaction between rate of movement and ablation may depend additionally on the degree to  
402 which the dominant solar radiation and downslope directions align. If they are in the same  
403 direction, glacier moss balls should move rapidly, downslope, towards the sun. However, if melt  
404 is being driven from a direction perpendicular to the downslope direction, then glacier moss  
405 balls will move considerably less per unit melt.

406

#### 407 *Longevity*

408 Glacier moss balls show considerable potential to persist across multiple years as stable  
409 ecological units. On average, 86% of the marked glacier moss balls included in this study  
410 survived annually which translates to a lifespan of more than 6 years. This longevity is on par

411 with large, long-lived vertebrates (e.g., adult female ungulates in typically have annual survival  
412 probabilities  $\geq 0.85$ ; Gaillard and Yoccoz 2003; Gaillard et al. 1998). Thus, with high rates of  
413 survival across multiple years, and relatively high detection rates, we consider glacier moss  
414 balls to be long-lived, rather than ephemeral, glacier features. Unlike living individual organisms  
415 which can show senescence as they age (e.g., Loison et al. 1999), moss ball survival rates are  
416 unlikely to decline with time in the traditional sense, nor are they likely to exhibit density  
417 dependence in survival (e.g., Festa-Bianchet et al. 2003), however the factors that control  
418 disaggregation may be the most important factor for moss ball longevity. At any rate, the  
419 temporal stability of individual moss balls on the glacier surface means that they likely exist for  
420 long enough to develop complex biotic communities, a fact supported by the distinctive  
421 invertebrate communities inhabiting moss balls (Coulson and Midgley 2012). However, the  
422 degree to which geographic location (e.g., distance to a glacier margin), and not persistence,  
423 influences invertebrate colonization remains to be tested.

424         The limited scope of our mark-recapture data collection precludes us from drawing  
425 conclusions about the inter-annual drivers of moss ball apparent survival. However, we can  
426 highlight potential factors that may influence it. First, it is possible that glacier moss balls moved  
427 more frequently out of the study area in one year versus others, perhaps due to exceptionally  
428 clear skies (and thus higher rates of glacier ablation). Second, we observed a number of  
429 fragmented moss balls. This fragmentation may be part of normal glacier moss ball growth  
430 trajectories, too frequent or intense freeze thaw cycles, perhaps as a product of moss ball water  
431 content, or some other as yet unknown factor. It is also unclear at what rate fragmented glacier  
432 moss balls continue to move and grow, eventually developing back into mature, ovoid, full-sized  
433 moss balls. If glacier moss balls did survive within our study area, they had an 84% probability  
434 of being detected in a given year. This indicates that our bracelet and colored beads marking  
435 scheme was relatively successful. However, for future studies, more robust marks should be  
436 considered. One possibility is the use of passive integrated transponder (PIT) tags which are  
437 commonly used for mark-recapture studies of a variety of organisms (e.g., fish; Castro-Santos  
438 et al. 1996), and allow researchers to scan study organisms electronically rather than rely on  
439 visual ID.

440

#### 441 *Genesis, growth, and disaggregation*

442         Our combined movement and longevity analyses allow us to add new speculation about  
443 patterns of glacier moss ball growth as well as additional evidence for previous hypotheses  
444 regarding their genesis and disaggregation (e.g., Heusser 1972; Perez 1991). In terms of

445 growth, our documentation of glacier moss balls rolling over a fine-grained, wet, sedimentary  
446 substrate is consistent with growth through the adherence of fine-grained sediment to an  
447 existing moss ball. When a moss ball rolls from its elevated pedestal, sediment grains stick to  
448 the moss (or potentially to the cohesive sediment itself). We visually observed such “dirty” moss  
449 on some glacier moss balls in our study area. As the moss itself grows, this adhered sediment  
450 may then become integrated within the fibrous material, increasing the size of the glacier moss  
451 ball. Field observation of moss growth over and around our identification bracelets indicates that  
452 several millimeters of growth can occur within years. However, the observation that most  
453 bracelets were not engulfed by sediment accumulation and moss growth during our four-year  
454 study period suggests an upper limit on moss ball growth. Consistent with a greater than 6-year  
455 lifespan, moss ball growth to an observed size of 10 cm must take years, and given the  
456 conservative nature of our longevity estimates, potentially much longer.

457         Understanding year-to-year moss ball growth, however, does not explain moss ball  
458 genesis, nor disaggregation. It is well-established that fibrous moss provides the skeletal  
459 structure that allows moss balls to be cohesive, ovoid structures. A source of moss spores is  
460 there essential for initial glacier moss ball genesis (in our study, putatively, the Donoho  
461 nunatak). The question, then, is how glacier moss balls begin to grow in the first place, and on  
462 what substrate. (Eythórsson 1951) suggested that a “stone kernel” is likely at their centers.  
463 However, later investigations (e.g., Shacklette 1966; Gremmen 1982) found mixed results that  
464 largely reflected a consensus that there is no general rule about rock cores at the center of  
465 glacier moss balls. Our exploratory testing of moss balls also indicated that some, but not all,  
466 moss balls contained a ~1-cm gravel “kernel” at their centers. Potentially, these kernels, with  
467 adhered fine-grained sediment, provide a growth substrate for initially wind-deposited moss  
468 spores. In our study area, the co-occurrence of moss balls with an unusually extensive, fine-  
469 grained “plume” of sediment cover (Fig. 1b) aligns with a similar observation by Heusser (1972)  
470 for the Gilkey Glacier in southeastern Alaska, USA. The fine-grained sediment may be essential  
471 proto-soil for moss ball growth and may explain the unusual density of moss ball occurrence at  
472 our study area. The origin of this fine-grained sediment is unknown, but in satellite imagery (Fig.  
473 1b), it appears to originate from the ice itself. It may be a volcanic ash layer emerging from the  
474 ice after being carried down from the high, volcanic, Wrangell Mountain peaks. Once moss  
475 growth initiates, the moss itself, and the abundant moisture of the ablating glacier surface, may  
476 provide the necessary cohesion for the incipient moss ball formation, and continued growth  
477 thereafter.

478           In this study, we identified very few glacier moss balls greater than ~15 cm on their long  
479 axis. Generally, moss balls appear to rarely exceed ~10 cm except for rare cases in Alaska  
480 where they have been reported up to 18 cm (Heusser 1972; Benninghoff 1955). Why glacier  
481 moss balls in Alaska appear to grow larger than elsewhere in the world remains an open  
482 question but, regardless of location, there appears to be some size limiting process within the  
483 moss ball lifecycle at work. Shacklette (1966) suggested that the tensile strength of moss stems  
484 may be the key factor controlling their size. Exceeding this tensile limit appears to occur when  
485 the moss ball major axis grows too great relative to the intermediate axis. For instance, when a  
486 moss ball becomes too elongated, subtle variations in ice surface topography may lead the two  
487 ends of a moss ball to move in different directions, leading to a tear in the middle when the  
488 moss ball's tensile strength is exceeded. We observed such a tearing-in-two of a long, linear  
489 moss ball during the course of our study. Again, while this process applies an upper-limit to  
490 moss ball size it also circles back to inform questions regarding the presence or absence of a  
491 rock kernel. If the upper size limit is reached and a moss ball splits, only one of the two  
492 remaining moss balls involved in this "cloning" process will retain the gravel kernel. This may  
493 explain why a number of moss balls do not appear to have any coarse-grained rock at their  
494 cores.

495

## 496 **Conclusions**

497           Since their first description nearly 75 years ago (Eythórsson 1951), a general  
498 understanding of the physical and biological composition of glacier moss balls and their  
499 ecological role as drivers of small-scale ecosystem development has been established. In this  
500 study, we extended this previous work to quantify the movement and longevity of glacier moss  
501 balls on an Alaskan glacier. In light of these results, we discussed a potential life cycle for moss  
502 balls. We showed that glacier moss balls move relatively quickly, at a rate of centimeters per  
503 day, and that moss balls within the surveyed colony speed up, slow down, and change direction  
504 in synchrony. This finding suggests that moss ball motion is controlled by some broadly applied  
505 external forcing. However, for our study, this external forcing was surprisingly not solely  
506 associated with either the wind or downslope direction. Instead, the glacier moss ball movement  
507 patterns we observed likely depend on a combination of the intensity of glacier ice ablation, the  
508 direction of solar radiation, and the physical surface of the glacier (i.e., the downslope direction).  
509 Future studies that take a similar mark-recapture approach to the study of glacier moss ball  
510 movements on multiple glaciers throughout the world, including a range of steepness, will shed  
511 important light on the general nature of their movements.

512 We also showed that glacier moss balls are long-lived, with an average life expectancy  
513 of more than 6 years, on par with many relatively long-lived vertebrates (e.g., large mammalian  
514 herbivores, Gaillard and Yoccoz 2003). This potential for glacier moss balls to act as relatively  
515 stable, long-term ecological units further confirms their potential to act as key habitat for  
516 invertebrates. Coulson and Midgley (2012) previously described invertebrate colonization of  
517 glacier moss balls and suggested that a lack of Enchytraeidae and Aranea may be the result of  
518 the ephemeral nature of moss balls in glacier habitats. Our results contrast with this assumption.  
519 Instead, we postulate that selective invertebrate colonization of glacier moss balls may depend  
520 instead on their geographic locations and their frequent movements or, as Coulson and Midgley  
521 (2012) noted, may simply reflect the variable dispersal capacities of potential colonizers.

522 Given the importance of microbial diversity to carbon cycling (Anesio et al. 2009),  
523 ecosystem function (Anesio et al. 2017; Hotaling et al. 2017a; Hotaling et al. 2017b), and even  
524 albedo (Ganey et al. 2017), future efforts to understand the microbial ecology of glacier moss  
525 balls could shed important light on their ecological role in glacier ecosystems. Like cryoconite,  
526 the granular, darkly pigmented dust that accumulates on the surface of glaciers and drives  
527 hotspots of biological activity and microbial diversity (Cook et al. 2016), glacier moss balls may  
528 have similar value at the ecosystem scale. Indeed, glacier moss balls may act as reservoirs of  
529 microbial diversity, seeding and re-seeding a glacier surface with key, colonizing microbial life  
530 as they move around its surface.

531

### 532 **Acknowledgements:**

533 We thank the Wrangell Mountains Center for logistical support and assisting with field  
534 measurements, and Dr. Billy Armstrong for providing the orthoimage of the study area.

535

### 536 **References:**

- 537 Akaike H (1998) Information theory and an extension of the maximum likelihood principle. In:  
538 Selected papers of Hirotugu Akaike. Springer, pp 199-213  
539 Anesio AM, Hodson AJ, Fritz A, Psenner R, Sattler B (2009) High microbial activity on glaciers:  
540 importance to the global carbon cycle. *Global change biology* 15:955-960  
541 Anesio AM, Laybourn-Parry J (2012) Glaciers and ice sheets as a biome. *Trends Ecol Evol*  
542 27:219-225  
543 Anesio AM, Lutz S, Christmas NA, Benning LG (2017) The microbiome of glaciers and ice  
544 sheets. *NPJ biofilms and microbiomes* 3:10  
545 Belkina OA, Vilnet AA (2015) Some aspects of the moss population development on the  
546 Svalbard glaciers. *Czech Polar Reports* 5:160-175  
547 Benninghoff WS (1955) Jökla mýs. *Journal of Glaciology* 2:514-515  
548 Castro-Santos T, Haro A, Walk S (1996) A passive integrated transponder (PIT) tag system for  
549 monitoring fishways. *Fisheries Research* 28:253-261

- 550 Cook J, Edwards A, Takeuchi N, Irvine-Fynn T (2016) Cryoconite: the dark biological secret of  
551 the cryosphere. *Progress in Physical Geography* 40:66-111
- 552 Coulson S, Midgley N (2012) The role of glacier mice in the invertebrate colonisation of glacial  
553 surfaces: the moss balls of the Falljökull, Iceland. *Polar Biology* 35:1651-1658
- 554 Deevey Jr ES (1947) Life tables for natural populations of animals. *The Quarterly Review of*  
555 *Biology* 22:283-314
- 556 Dial RJ, Becker M, Hope AG, Dial CR, Thomas J, Slobodenko KA, Golden TS, Shain DH (2016)  
557 The role of temperature in the distribution of the glacier ice worm, *Mesenchytraeus*  
558 *solifugus* (Annelida: Oligochaeta: Enchytraeidae). *Arctic, Antarctic, and Alpine Research*  
559 48:199-211
- 560 Eythórsson J (1951) Correspondence. *Jökla-mys. Journal of Glaciology* 1:503
- 561 Festa-Bianchet M, Gaillard JM, Côté SD (2003) Variable age structure and apparent density  
562 dependence in survival of adult ungulates. *Journal of Animal Ecology* 72:640-649
- 563 Gaillard J-M, Festa-Bianchet M, Yoccoz NG (1998) Population dynamics of large herbivores:  
564 variable recruitment with constant adult survival. *Trends in Ecology & Evolution* 13:58-63
- 565 Gaillard J-M, Yoccoz NG (2003) Temporal variation in survival of mammals: a case of  
566 environmental canalization? *Ecology* 84:3294-3306
- 567 Ganey GQ, Loso MG, Burgess AB, Dial RJ (2017) The role of microbes in snowmelt and  
568 radiative forcing on an Alaskan icefield. *Nature Geoscience* 10:754
- 569 Gardner AS, Moholdt G, Cogley JG, Wouters B, Arendt AA, Wahr J, Berthier E, Hock R, Pfeffer  
570 WT, Kaser G (2013) A reconciled estimate of glacier contributions to sea level rise: 2003  
571 to 2009. *Science* 340:852-857
- 572 Gremmen N (1982) The vegetation of Subantarctic Islands Marion and Prince Edward. The  
573 Hague, Boston, London, W. Junk Publishers,
- 574 Heusser CJ (1972) Polsters of the moss *Drepanocladus berggrenii* on Gilkey Glacier, Alaska.  
575 *Bulletin of the Torrey Botanical Club*:34-36
- 576 Hotaling S, Finn DS, Joseph Giersch J, Weisrock DW, Jacobsen D (2017a) Climate change and  
577 alpine stream biology: progress, challenges, and opportunities for the future. *Biological*  
578 *Reviews* 92:2024-2045
- 579 Hotaling S, Hood E, Hamilton TL (2017b) Microbial ecology of mountain glacier ecosystems:  
580 biodiversity, ecological connections and implications of a warming climate.  
581 *Environmental microbiology* 19:2935-2948
- 582 Hotaling S, Shain DH, Lang SA, Bagley RK, Lusha M, Weisrock DW, Kelley JL (2019) Long-  
583 distance dispersal, ice sheet dynamics, and mountaintop isolation underlie the genetic  
584 structure of glacier ice worms. *Proceedings of the Royal Society B: Biological Sciences*  
585 286:20190983
- 586 Hurvich CM, Tsai C-L (1989) Regression and time series model selection in small samples.  
587 *Biometrika* 76:297-307
- 588 Larsen C, Burgess E, Arendt A, O'neel S, Johnson A, Kienholz C (2015) Surface melt  
589 dominates Alaska glacier mass balance. *Geophysical Research Letters* 42:5902-5908
- 590 Lebreton J-D, Burnham KP, Clobert J, Anderson DR (1992) Modeling survival and testing  
591 biological hypotheses using marked animals: a unified approach with case studies.  
592 *Ecological Monographs* 62:67-118
- 593 Loison A, Festa-Bianchet M, Gaillard J-M, Jorgenson JT, Jullien J-M (1999) Age-specific  
594 survival in five populations of ungulates: evidence of senescence. *Ecology* 80:2539-2554
- 595 Mann D, Edwards J, Gara R (1980) Diel activity patterns in snowfield foraging invertebrates on  
596 Mount Rainier, Washington. *Arctic and Alpine Research* 12:359-368
- 597 Millar JS, Zammuto RM (1983) Life histories of mammals: an analysis of life tables. *Ecology*  
598 64:631-635

- 599 Perez FL (1991) Ecology and morphology of globular mosses of *Grimmia longirostris* in the  
600 Paramo de Piedras Blancas, Venezuelan Andes. *Arctic and Alpine Research* 23:133-  
601 148
- 602 Porter P, Evans A, Hodson A, Lowe A, Crabtree M (2008) Sediment–moss interactions on a  
603 temperate glacier: Falljökull, Iceland. *Annals of Glaciology* 48:25-31
- 604 Roe GH, Baker MB, Herla F (2017) Centennial glacier retreat as categorical evidence of  
605 regional climate change. *Nature Geoscience* 10:95
- 606 Rosvold J (2016) Perennial ice and snow-covered land as important ecosystems for birds and  
607 mammals. *Journal of biogeography* 43:3-12
- 608 Shacklette HT (1966) Unattached moss polsters on Amchitka Island, Alaska. *Bryologist*:346-352
- 609 Uetake J, Tanaka S, Hara K, Tanabe Y, Samyn D, Motoyama H, Imura S, Kohshima S (2014)  
610 Novel biogenic aggregation of moss gemmae on a disappearing African glacier. *PloS*  
611 *one* 9:e112510
- 612 Van der Walt S, Schönberger JL, Nunez-Iglesias J, Boulogne F, Warner JD, Yager N, Guillard  
613 E, Yu T (2014) scikit-image: image processing in Python. *PeerJ* 2:e453
- 614
